# Supplementary material for: Long-Term Engagement With a Mobile Self-Management System for People With Type 2 Diabetes
Source: PubMed Central journal article supplement (PMC4114413; doi:10.2196/mhealth.2432), 2013-03-27

Multimedia Appendix 1 – Long-term usage rates of the blood glucose sensor system (○, straight line in blue), the nutrition habit recording system (□, dotted line in red), and the physical activity sensor system (△, dashed line in green) by the participants.

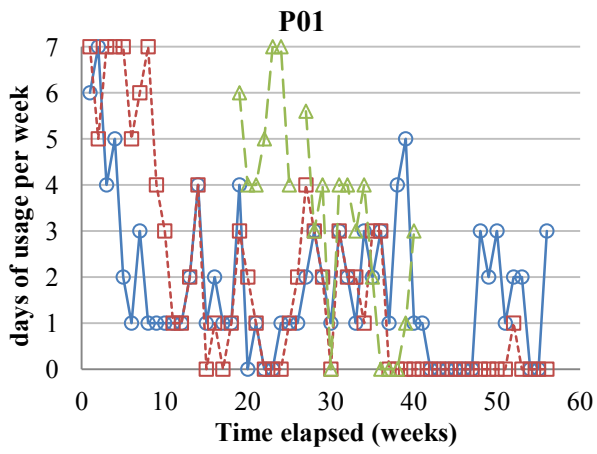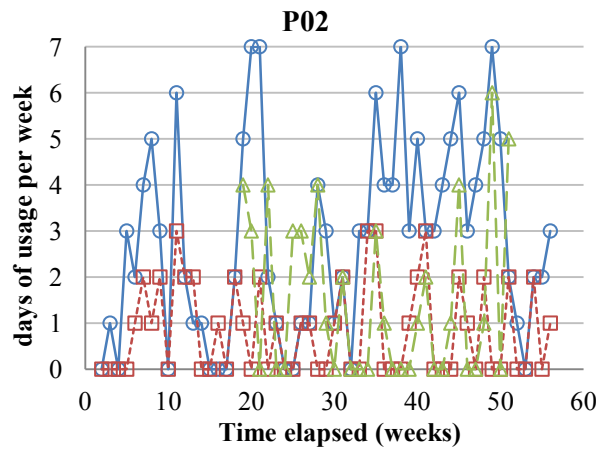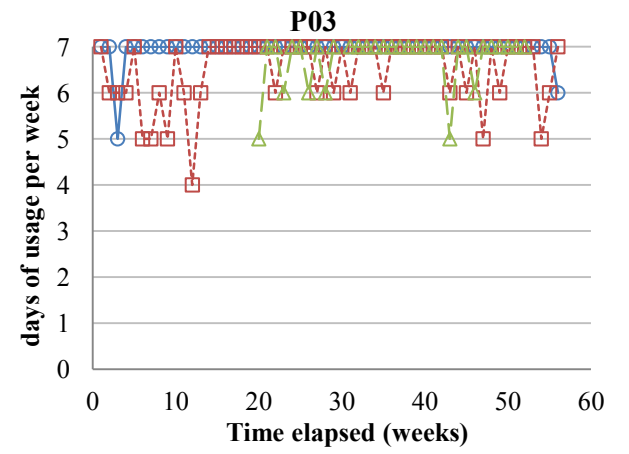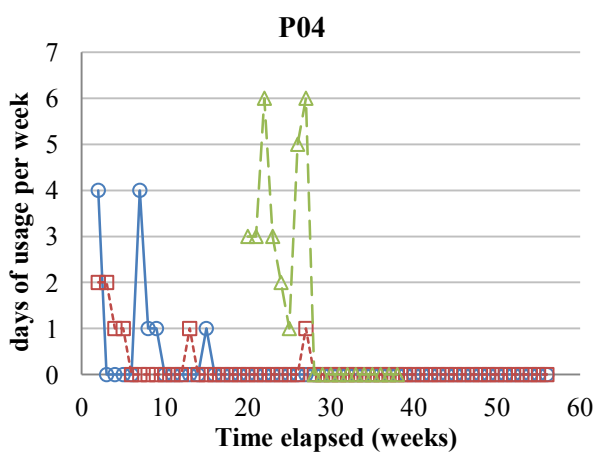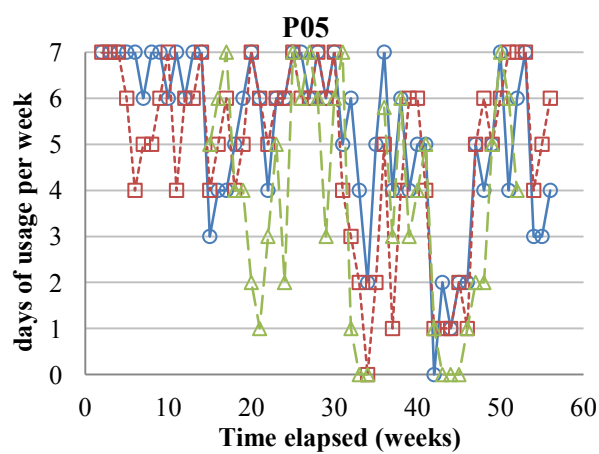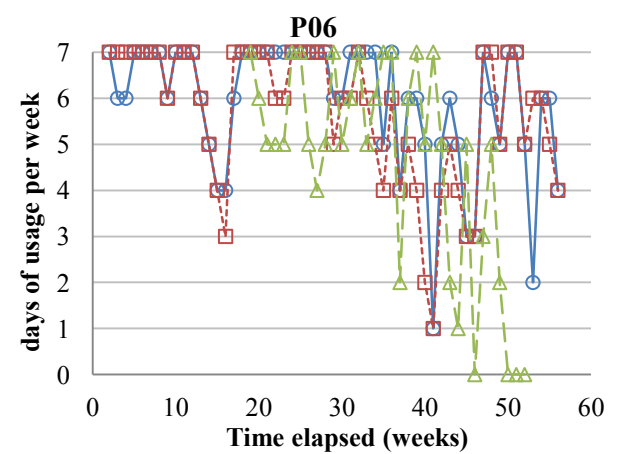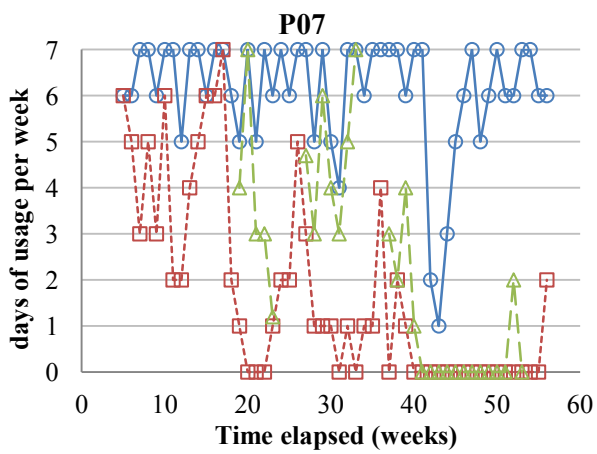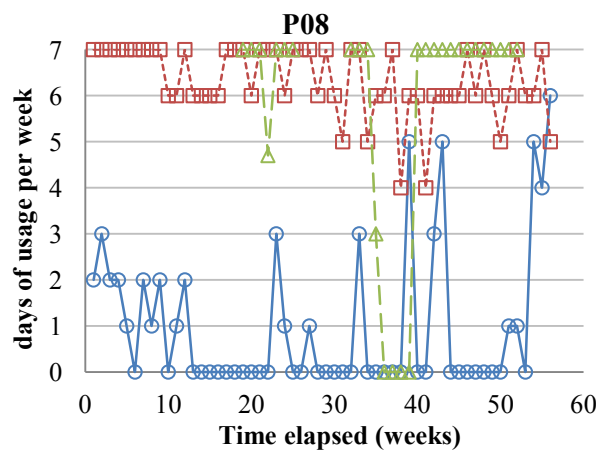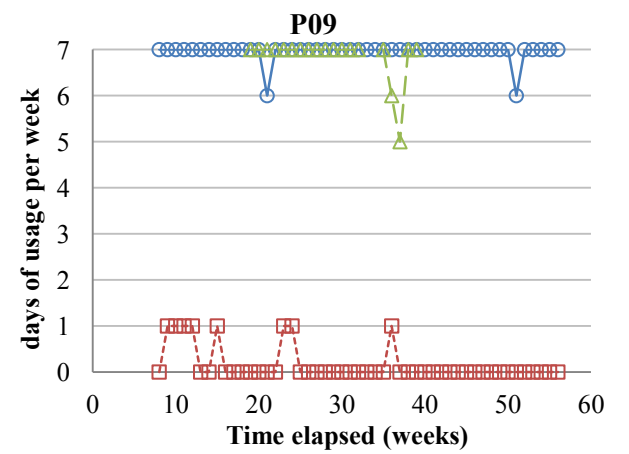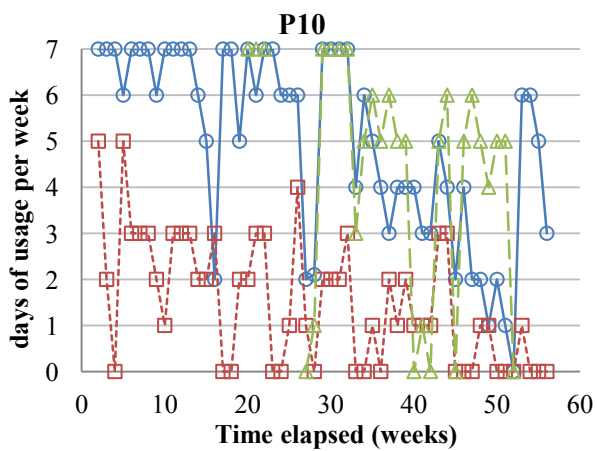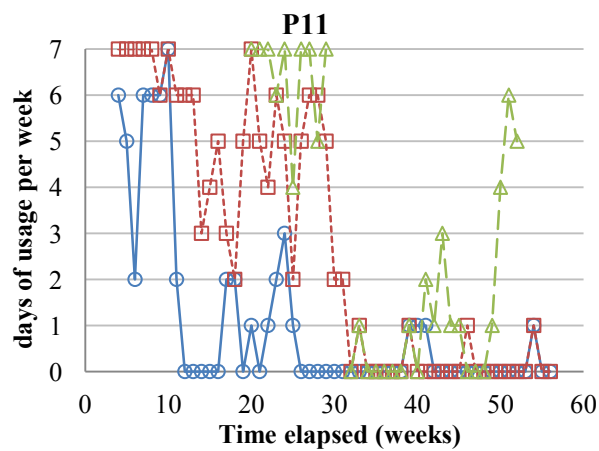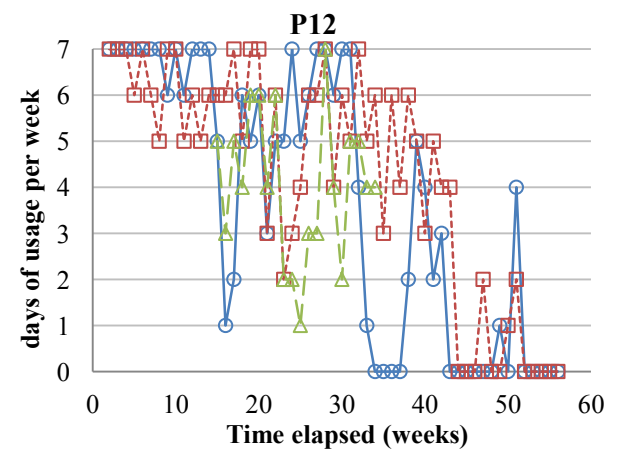

Supplement: mhealth_v1i1e1_app1.pdf [file mhealth_v1i1e1_app1.pdf]
