# Supplementary material for: Long-Term Engagement With a Mobile Self-Management System for People With Type 2 Diabetes
Source: PubMed Central journal article supplement (PMC4114413; doi:10.2196/mhealth.2432), 2013-03-27

Multimedia Appendix 2 – Kernel density estimates on distribution of time points at which blood glucose measurement occurred during the day along the trial duration. N is the total number of data.

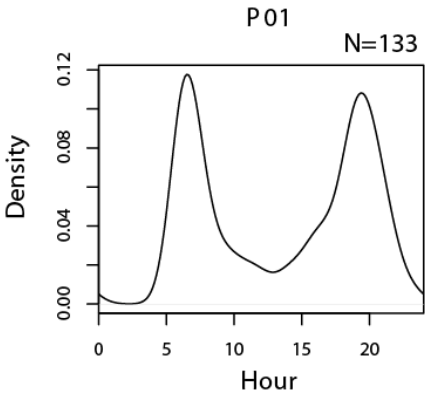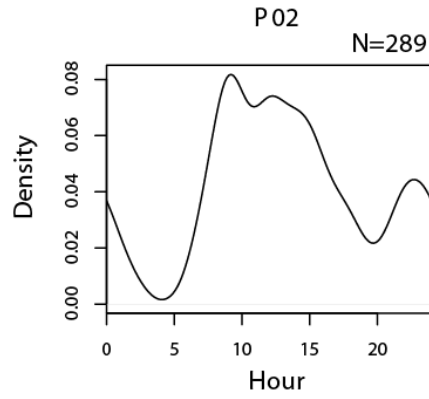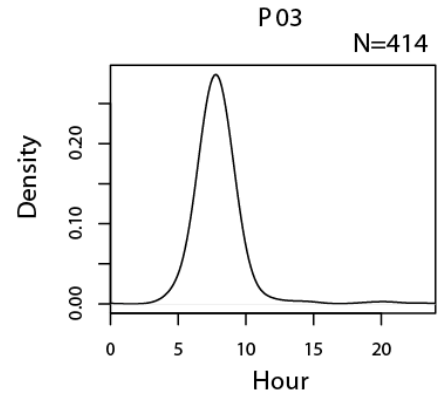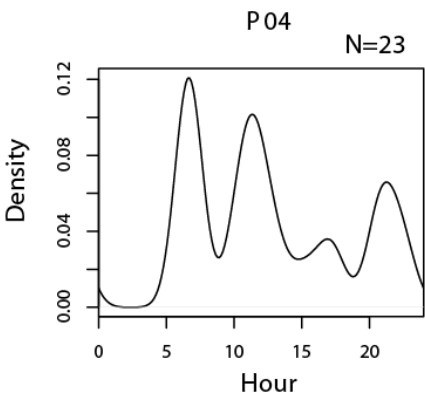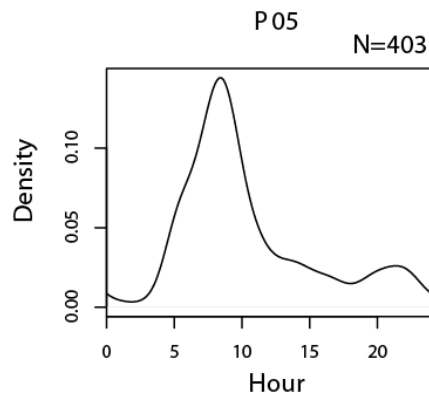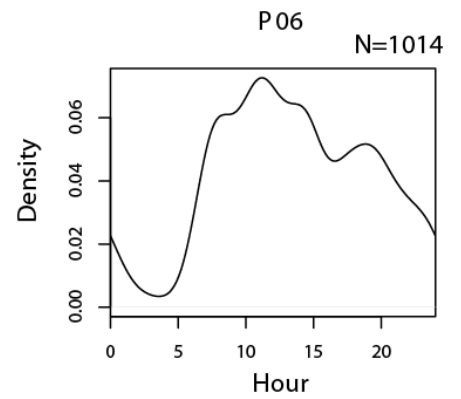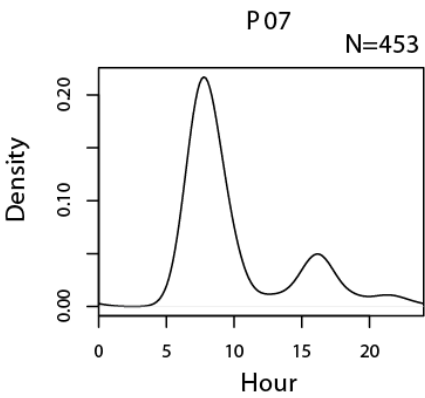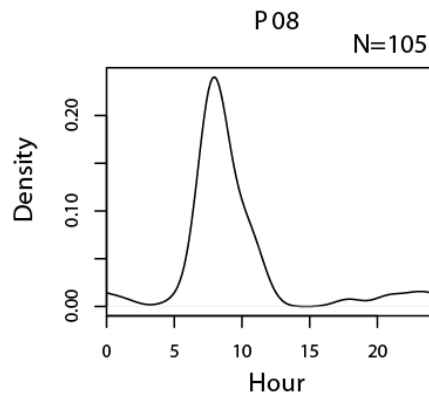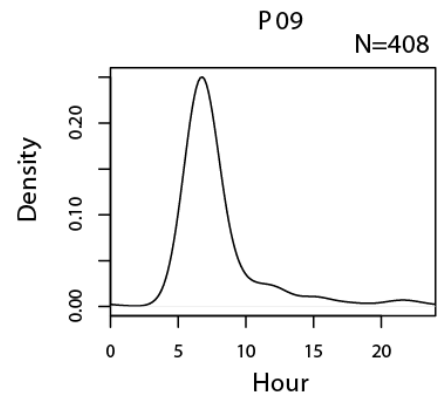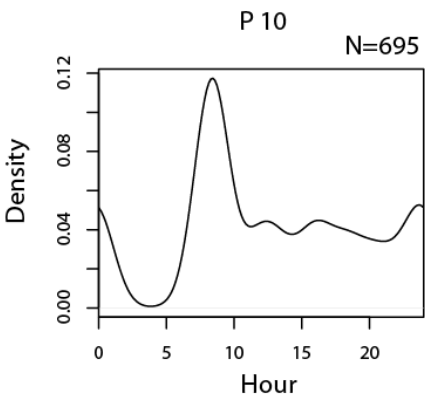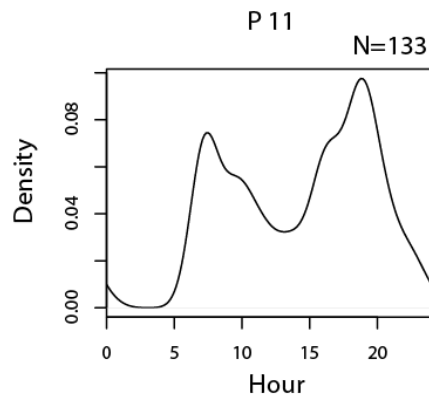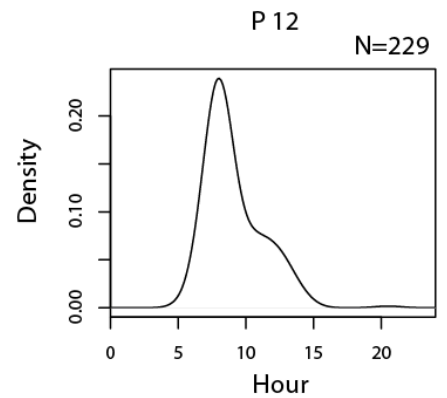

Supplement: mhealth_v1i1e1_app2.pdf [file mhealth_v1i1e1_app2.pdf]
