# Supplementary material for: Long-Term Engagement With a Mobile Self-Management System for People With Type 2 Diabetes
Source: PubMed Central journal article supplement (PMC4114413; doi:10.2196/mhealth.2432), 2013-03-27
Supplement: mhealth_v1i1e1_app4.pdf [file mhealth_v1i1e1_app4.pdf]

Multimedia Appendix 4 – Summary of answers to original questionnaires

Questionnaire 1 - Distribution of the answers to questionnaire about satisfaction with elements of the Few Touch application. (1: Very dissatisfied, 2: Dissatisfied, 3: Neither satisfied nor dissatisfied / I don't know, 4: Satisfied, 5: Very satisfied) (adapted from [28, 29])

| Elements / Satisfaction level                    | 1 | 2 | 3 | 4 | 5 | Mean |
|--------------------------------------------------|---|---|---|---|---|------|
| Color use in Diabetes Diary                      | 0 | 0 | 0 | 3 | 9 | 4.8  |
| Simplicity of navigation in Diabetes Diary       | 0 | 0 | 0 | 3 | 9 | 4.8  |
| Text legibility                                  | 0 | 0 | 0 | 4 | 8 | 4.7  |
| Ease of interpreting blood glucose graph         | 0 | 0 | 1 | 2 | 9 | 4.7  |
| Size of display                                  | 0 | 0 | 1 | 3 | 8 | 4.6  |
| Button size of Diabetes Diary                    | 0 | 0 | 2 | 1 | 9 | 4.6  |
| Ease of interpreting step graph                  | 0 | 0 | 1 | 3 | 8 | 4.6  |
| Simplicity of changing goals                     | 0 | 0 | 1 | 6 | 5 | 4.3  |
| Reaction time of Diabetes Diary                  | 0 | 0 | 2 | 5 | 5 | 4.3  |
| Size of the Smartphone                           | 0 | 1 | 0 | 7 | 4 | 4.2  |
| Simplicity of nutrition habit recording          | 0 | 0 | 3 | 4 | 5 | 4.2  |
| Battery life of the Smartphone                   | 0 | 0 | 3 | 5 | 4 | 4.2  |
| Ease of interpreting feedback on nutrition habit | 0 | 0 | 4 | 3 | 5 | 4.1  |
| Step counter                                     | 0 | 0 | 4 | 3 | 5 | 4.1  |

Questionnaire 2 - Agreement with motivational effect of each function on better self-management

(1: Totally disagree, 2: Disagree, 3: Neither / I don't know, 4: Agree, 5: Totally agree)

| Functions / Agreement level on motivational effect | 1 | 2 | 3 | 4 | 5 | Mean |
|----------------------------------------------------|---|---|---|---|---|------|
| Blood glucose sensor system                        | 0 | 0 | 2 | 3 | 7 | 4.4  |
| Physical activity sensor system                    | 0 | 0 | 2 | 4 | 6 | 4.3  |
| Nutrition habit registration system                | 0 | 2 | 0 | 4 | 6 | 4.2  |
| Tips function                                      | 0 | 0 | 3 | 6 | 3 | 4.0  |

Questionnaire 3 - Agreement with effect of usage of the Few Touch application on behavior change in activities for self-management of diabetes (1: Totally disagree, 2: Disagree, 3: Neither / I don't know, 4: Agree, 5: Totally agree)

| Behaviors / Agreement level on the effect of the application | 1 | 2 | 3 | 4 | 5 | Mean |
|--------------------------------------------------------------|---|---|---|---|---|------|
| Healthier nutrition habits                                   | 0 | 0 | 4 | 4 | 4 | 4.0  |
| Being more physically active                                 | 0 | 0 | 4 | 4 | 4 | 4.0  |
| Sufficiently frequent blood glucose measurement              | 0 | 1 | 4 | 6 | 1 | 3.6  |

Questionnaire 5 - Satisfaction level with knowledge about diabetes and with skills in diabetes management. (1: Very dissatisfied, 2: dissatisfied, 3: Neither / I don't know, 4: Satisfied, 5: Very satisfied)

| Items and Time elapsed / satisfaction level     | 1 | 2 | 3 | 4  | 5 | Mean |
|-------------------------------------------------|---|---|---|----|---|------|
| <b>knowledge about diabetes</b>                 |   |   |   |    |   |      |
| Starting point (Meeting 1) <sup>a</sup>         | 0 | 0 | 1 | 9  | 1 | 4.0  |
| 6 months (Meeting 4)                            | 0 | 0 | 1 | 10 | 1 | 4.0  |
| 1 year (Meeting 6)                              | 0 | 0 | 1 | 10 | 1 | 4.0  |
| <b>Skills in conducting diabetes management</b> |   |   |   |    |   |      |
| Starting point (Meeting 1)                      | 0 | 0 | 2 | 7  | 3 | 4.1  |
| 6 months (Meeting 4)                            | 0 | 0 | 1 | 7  | 4 | 4.3  |
| 1 year (Meeting 6)                              | 0 | 1 | 0 | 8  | 3 | 4.1  |

<sup>a</sup> One participant did not answer this question

Questionnaire 6 - Expected frequency of usage of the Few Touch application in future

| Time elapsed / frequency of use | seldom | monthly | weekly | daily |
|---------------------------------|--------|---------|--------|-------|
| 6 months (Meeting 4)            | 0      | 0       | 2      | 10    |
| 1 year (Meeting 6)              | 0      | 1       | 4      | 7     |

Questionnaire 7 – Satisfaction level with the tips function (1: Very dissatisfied, 2: dissatisfied, 3: Neither / I don't know, 4: Satisfied, 5: Very satisfied)

| Elapsed time / Satisfaction level   | 1 | 2              | 3              | 4 | 5 | Mean |
|-------------------------------------|---|----------------|----------------|---|---|------|
| 3-4 months (Meeting 3) <sup>a</sup> | 0 | 1 <sup>a</sup> | 1 <sup>a</sup> | 5 | 6 | 4.1  |
| 6 months (Meeting 4) [29]           | 0 | 0              | 1              | 8 | 3 | 4.2  |
| 1 year (Meeting 6)                  | 0 | 0              | 3              | 6 | 3 | 4.0  |

<sup>a</sup> One participant marked both 2 and 3 to this question. Therefore, for calculation of mean we counted the score by this participant as -0.5.

Questionnaire 8 - Distribution of the answers to questionnaire if the participants wish to have following elements in the Few Touch application. (1: Totally disagree, 2: Disagree, 3: Neither / I don't know, 4: Agree, 5: Totally agree) (adapted from [28])

| Elements / Satisfaction level                                                        | 1 | 2 | 3 | 4 | 5 | Mean |
|--------------------------------------------------------------------------------------|---|---|---|---|---|------|
| A smaller step counter that is easier to wear                                        | 0 | 0 | 3 | 1 | 8 | 4.4  |
| Tips that pop up on the mobile phone screen automatically                            | 0 | 0 | 1 | 6 | 5 | 4.3  |
| Automatic feedback based on measurements and personal medical data                   | 0 | 0 | 2 | 7 | 3 | 4.1  |
| Use of own mobile phone                                                              | 0 | 1 | 2 | 4 | 5 | 4.1  |
| Reminder for blood glucose measurement                                               | 0 | 0 | 4 | 4 | 4 | 4.0  |
| Feedback delivery on mobile phone from healthcare professionals                      | 0 | 2 | 1 | 4 | 5 | 4.0  |
| Reminder for nutrition habit recording                                               | 0 | 0 | 4 | 5 | 3 | 3.9  |
| Data transfer to general practitioner when the data is alarming                      | 1 | 0 | 2 | 5 | 4 | 3.9  |
| Platform of communication with patient peers for message exchange, data/goal sharing | 0 | 3 | 2 | 3 | 4 | 3.7  |
| Data transfer to general practitioner on regular basis                               | 1 | 1 | 4 | 5 | 1 | 3.3  |

Questionnaire 9 - Answers to questions about whether the following issues have been improved in the course of the trial (“x” for yes)

| Participant | Medication | Nutrition habits | Level of physical activity | Blood glucose control |
|-------------|------------|------------------|----------------------------|-----------------------|
| P01         |            | x                | x                          | x                     |
| P02         |            |                  | x                          | x                     |
| P03         |            | x                |                            |                       |
| P04         |            | x                | x                          | x                     |
| P05         |            |                  | x                          |                       |
| P06         |            | x                |                            | x                     |
| P07         |            |                  |                            |                       |
| P08         |            |                  | x                          | x                     |
| P09         |            |                  |                            |                       |
| P10         |            | x                | x                          |                       |
| P11         |            | x                | x                          | x                     |
| P12         |            | x                | x                          |                       |
| Total       | 0          | 7                | 8                          | 6                     |
